# Supplementary material for: Pressure Without Price? Perceived Fiscal Pressure and Compensatory Consumption in VAT Discourse
Source: Research Square preprint supplement (doi:10.21203/rs.3.rs-8735260/v1), 2026-02-12
Supplement: Supplementary file 1 [file 85d190bdc2abb26b640714bd.docx]

**Highlights**

• VAT discourse generates perceived fiscal pressure that elevates financial anxiety among Generation Z consumers.

• Financial anxiety mediates the relationship between perceived fiscal pressure and compensatory consumption behaviour.

• Clearer fiscal communication may reduce anxiety-driven consumption and unintended welfare spillovers.
